# Supplementary material for: Two-Phase Thermal Simulation of Matrix Acidization Using the Non-Isothermal Darcy–Brinkman–Forchheimer Model
Source: Copernicus journal article supplement (doi:10.5194/egusphere-2025-4800), 2025-11-13
Supplement: Supplementary file [file egusphere-2025-4800-AC2-supplement.pdf]

## Responses to the comments

*We would like to express our gratitude and deep thanks to the reviewers and editors for taking the time to review our work and for their comments which help focus the goal of this research.*

The topic is relevant, and the attempt to combine two-phase flow, thermal effects, and DBF momentum balance in one acidizing model is potentially valuable. The manuscript also addresses an important practical issue: how thermal and hydrodynamic conditions influence wormhole formation. However, in its present form, the paper does not yet provide sufficient methodological rigor or numerical evidence to support its claims at the publication level. The most serious issues are the lack of proper verification/validation, insufficient numerical detail, limited quantitative analysis, and several places where the claims are stronger than the presented evidence. For these reasons, I recommend major revision.

### Major comments:

1. The manuscript contains a section titled “Verification experiments,” but this does not constitute verification in the numerical sense. Instead, it presents an additional parametric study on the effect of injection velocity. It does not validate the solver against analytical solutions, benchmark problems, experimental data, or previously validated numerical results. I recommend adding a proper verification section after the methodology and before the numerical experiments. This section should demonstrate the validity of the model—either as a whole or for its individual components—by comparison with existing benchmarks or, at a minimum, previously published numerical models.

Response: *We have added the verification section in the new manuscript.*

2. A central weakness of the paper is that the solution procedure is not described with sufficient clarity for reproducibility. The current presentation makes it difficult for readers to understand how the coupled problem is actually solved. This section should explicitly clarify:

- whether the coupling strategy is fully implicit (monolithic), sequential implicit, or loosely coupled. From the current description, it appears that a staggered approach is used, which does not fully enforce coupling between the primary variables;
- whether any inner (within-time step) iterations are performed;

- the convergence criteria adopted;
- how nonlinear residuals are defined and monitored;
- how boundary conditions are imposed for pressure, saturation, concentration, and temperature;
- how stability is influenced by the treatment of thermal source/transport terms (Eq. 8), particularly given the use of explicit discretization, and the rationale for this choice;
- the justification for and implementation of upwind discretization for edge saturations and acid concentration.

I also recommend including the fully discretized form of the governing equations (as it appears a finite difference method is employed), along with a clear flowchart of the solution algorithm, to ensure transparency and reproducibility.

Response: We thank the reviewer for the valuable comments regarding the clarity and reproducibility of the numerical implementation. We agree that the original manuscript did not provide sufficient detail on the coupling strategy and numerical solution procedure. To address this concern, we have substantially revised the “Solution Procedure” section and added additional explanations regarding the discretization and coupling strategy.

First, we now explicitly state that the proposed solver adopts a sequential implicit staggered coupling strategy rather than a fully monolithic formulation. In each time step, the primary variables are updated sequentially in the following order: porosity, saturation, pressure/velocity, acid concentration, and temperature. The coupling between variables is handled through updated coefficients and source terms passed between successive substeps.

Second, we clarify that no inner nonlinear iterations are performed within each time step. Instead, the nonlinear terms are linearized using previously updated variables from the current or previous time level. We also explain the linearization treatment for the nonlinear DBF momentum terms and reactive source terms.

Third, the simulations are advanced using sufficiently small time steps to ensure stable evolution of the coupled thermo-hydraulic-reactive system. The breakthrough criterion and grid-convergence verification are now described more clearly in the revised manuscript.

Fourth, the detailed description of the boundary conditions imposed for pressure, saturation, concentration, and temperature, including the inlet velocity condition,

outlet pressure condition, impermeable wall treatment, and thermal boundary assumptions is given in the experiment section.

Fifth, the rationale for the discretization strategy has been clarified. In particular, the advection-dominated saturation and concentration transport terms are discretized using an upwind scheme to suppress nonphysical oscillations and improve numerical stability near steep displacement fronts. The thermal transport equation adopts a partially explicit treatment for several source and transport terms to reduce computational cost and avoid solving a strongly nonlinear fully coupled thermal system within each time step. The stability of this treatment is maintained through the use of sufficiently small time steps.

Finally, following the reviewer's suggestion, we have added a flowchart summarizing the overall numerical algorithm, with the aim of improving transparency and reproducibility of the implementation.

**3.** The paper states that the model can simulate complex field phenomena “with high fidelity” and bridge the gap to **practical field applications**. This is too strong for a 2D lab-scale numerical demonstration without validation. Similarly, the conclusion section moves quickly toward future field-scale, surrogate-model, and optimization applications, but the present manuscript has not yet demonstrated the reliability required for such extensions. The authors should moderate these claims and more clearly position the work as a methodological step rather than a validated predictive tool.

Response: We thank the reviewer for this important comment. We agree that several statements in the original manuscript overstated the current level of validation and applicability of the proposed model. The present work is primarily intended as a methodological and numerical study for investigating the coupled thermo-hydraulic-reactive behavior in two-phase acidizing systems, rather than as a fully validated predictive field-scale simulator.

Following the reviewer's suggestion, we have revised the manuscript to moderate these claims throughout the Introduction, Results, and Conclusion sections. In particular, phrases such as “with high fidelity” and statements implying direct field-scale predictive capability have been removed or reworded. The revised manuscript now emphasizes that the proposed framework represents a proof-of-concept numerical methodology for studying the influence of thermal and hydrodynamic conditions on dissolution behavior and wormhole formation.

We have also clarified that the current simulations are limited to two-dimensional laboratory-scale numerical experiments and that additional validation against

experimental data, benchmark studies, and larger-scale simulations is required before practical field-scale predictive applications can be claimed. Furthermore, discussions related to surrogate modeling, optimization, and field applications are now presented more carefully as possible future research directions rather than demonstrated capabilities of the current study.

4. The discussion relies heavily on visual comparisons of porosity, saturation, concentration, streamlines, and temperature fields. The results section would be significantly stronger with quantitative metrics such as the following:

- breakthrough time and PVBT versus injection temperature and velocity,
- reacted mineral volume,
- acid utilization efficiency,
- wormhole length, width, branching density, or localization index

At present, the conclusions are plausible, but not quantified to a level expected for a strong modeling paper.

Response: We thank the reviewer for the helpful suggestion regarding quantitative analysis of the simulation results. We agree that quantitative metrics are important for evaluating acidizing performance. However, we would like to clarify that the revised manuscript already includes several quantitative measures, particularly the pore volume to breakthrough (PVBT), which is one of the most widely used quantitative indicators in matrix acidizing studies for characterizing stimulation efficiency and dissolution behavior.

In the manuscript, PVBT values are explicitly reported and compared for different injection temperatures and injection velocities. For example, the simulations with injected acid temperatures of 290 K, 320 K, and 360 K produce PVBT values of 10.92, 6.39, and 3.12, respectively (marked as red). These results provide quantitative support for the conclusions regarding the influence of thermal and hydrodynamic conditions on wormhole formation and acidizing efficiency.

In addition to PVBT, the manuscript also presents quantitative comparisons through normalized pressure-drop evolution, saturation relative-error analysis, and breakthrough criteria. Therefore, the conclusions are not based solely on visual inspection of porosity and saturation fields.

At the same time, we agree that additional quantitative descriptors such as reacted mineral volume, wormhole localization indices, or branching-density measures could provide further characterization of the dissolution structures. However, these

quantities are not yet standard or uniquely defined for the present two-phase thermal DBF framework and would require additional methodological development beyond the scope of the current study. To improve clarity, we have further emphasized the existing quantitative metrics in the revised manuscript and added additional explanations where appropriate.

### **Minor comments**

**1.** The parameter table is informative, but it would benefit from the addition of a column describing the physical meaning of each parameter, as well as references to literature sources or notes on calibration.

Response: We thank the reviewer for this valuable suggestion. We agree that additional information regarding the physical meaning and sources of the model parameters would improve the clarity and reproducibility of the manuscript. Following the reviewer's recommendation, the parameter table has been revised by adding an additional column describing the physical meaning of each parameter. We have also added references to the corresponding literature sources where the parameter values were adopted or estimated.

For parameters that are not directly taken from previous studies, additional notes have been included to clarify whether they are assumed values, benchmark parameters, or numerically selected values used for stability and demonstration purposes in the present simulations. These revisions improve the transparency of the numerical setup and make the parameter selection procedure clearer to readers

**2.** The section titled "Verification experiments" should be revised. It does not represent verification in the conventional computational science sense; a more appropriate title would be "Additional parametric study" or similar.

Response: We have modified it accordingly.

**3.** While the conclusions clearly summarize the results, they should more carefully distinguish between findings that are directly supported by the simulations and those that remain speculative or interpretive.

Response: We thank the reviewer for this helpful comment. We agree that the original conclusion section did not sufficiently distinguish between observations directly supported by the present simulations and broader interpretations or future perspectives. In response, we have revised the conclusion section to more clearly separate the numerical findings demonstrated in the current study from speculative discussions and potential future developments.

**4.** The quality of the figures should be improved to ensure high-resolution output. In addition, some figure titles appear to be inaccurate and should be corrected for clarity and consistency.

Response: Several figure titles and captions have been revised for improved clarity, accuracy, and consistency throughout the manuscript. In particular, ambiguous or repetitive descriptions have been corrected, and the terminology used in the captions has been unified to better match the corresponding simulation conditions and physical quantities presented in the figures. These revisions improve the overall readability and professionalism of the manuscript.

# 1 Two-Phase Thermal Simulation of Matrix Acidization

## 2 Using the Non-Isothermal Darcy–Brinkman–

### 3 Forchheimer Model

4 Yuanqing Wu<sup>1</sup>, Jisheng Kou<sup>2,3</sup>

5 <sup>1</sup>School of Computer Science and Technology, Dongguan University of Technology, Dongguan  
6 523808, Guangdong, China

7 <sup>2</sup>State Key Laboratory of Intelligent Deep Metal Mining and Equipment, Shaoxing University,  
8 Shaoxing 312000, Zhejiang, China

9 <sup>3</sup>Zhejiang Key Laboratory of Rock Mechanics and Geohazards, School of Civil Engineering,  
10 Shaoxing University, Shaoxing 312000, Zhejiang, China

11 *Correspondence to:* Jisheng Kou (jishengkou@163.com)

12 **Abstract.** This study presents a comprehensive two-phase thermal model for simulating matrix  
13 acidization in porous media using the non-isothermal Darcy–Brinkman–Forchheimer framework. The  
14 model integrates multiphase flow, reactive transport, dynamic porosity evolution, and heat transfer,  
15 with temperature-dependent reaction kinetics incorporated through an Arrhenius-type formulation. A  
16 series of numerical experiments are conducted to investigate the effects of initial matrix temperature,  
17 injected acid temperature, and injection velocity on dissolution behaviour and wormhole formation.  
18 Results show that the initial matrix temperature has minimal influence due to rapid thermal  
19 equilibrium, while high acid temperature significantly enhances reaction rates and promote localized  
20 wormhole growth. Verification experiments confirm that increasing acid temperature produces effects  
21 similar to decreasing injection velocity, as both shift the dissolution pattern from uniform to ramified  
22 and wormhole-dominated regimes. These findings offer valuable insights for optimizing acidizing  
23 treatments by balancing thermal and hydrodynamic conditions to improve stimulation efficiency.

#### 24 1. Introduction

25 Matrix acidizing is a widely used stimulation technique in the petroleum industry aimed at enhancing  
26 the productivity of hydrocarbon reservoirs, particularly in carbonate and sandstone formations. The  
27 process involves injecting reactive acid solutions—commonly hydrochloric acid—into the reservoir at  
28 pressures below the fracture pressure, allowing the acid to flow through the porous matrix and dissolve  
29 mineral components that block pore spaces. This dissolution improves the permeability of the  
30 formation, facilitating more efficient oil and gas flow to the wellbore. Matrix acidizing is especially  
31 important in carbonate reservoirs, where it can lead to the formation of high-conductivity channels  
32 known as wormholes, significantly boosting well performance. As a cost-effective and controllable  
33 stimulation method, matrix acidizing plays a crucial role in maximizing recovery from existing wells

34 and extending the productive life of mature fields (Araújo et al., 2024; Mahdavi Kalatehno et al., 2025;  
35 Qureshi et al., 2023).

36 Numerical simulation is a crucial method for studying matrix acidizing. The evolution of numerical  
37 models for matrix acidizing can be summarized as follows: The earliest single-phase model, based on  
38 the Darcy scale, was introduced by (Daccord et al., 1993a, 1993b; Fredd and Fogler, 1998). (Golfier et  
39 al., 2002) later evaluated the Darcy-scale model's ability to capture different dissolution regimes and  
40 assess how flow parameters influence wormhole development. (Panga et al., 2005) advanced the field  
41 by proposing the two-scale model (Darcy scale and pore scale), which describes transport and reaction  
42 mechanisms in reactive dissolution and studies wormhole formation during carbonate core acidization.  
43 However, these models rely solely on Darcy's equation, which fails to accurately represent fluid  
44 dynamics in high-porosity regions that form during acidizing. As porosity increases—sometimes  
45 approaching unity in certain zones—Darcy's law becomes inadequate. Additionally, fluid velocities in  
46 these regions can rise significantly. To address this limitation, (Wu et al., 2015) introduced the Darcy-  
47 Brinkman-Forchheimer (DBF) model, incorporating Brinkman and Forchheimer terms into the  
48 momentum equations to better describe fluid dynamics in high-porosity conditions. Later, (Wu et al.,  
49 2022) combined the DBF framework with a continuum fracture model to simulate matrix acidization in  
50 fractured porous media, achieving accurate results with a simplified approach. The DBF framework has  
51 also been widely applied in other research areas, as seen in studies by (Alokaily, 2022; Deb et al., 2024;  
52 Shahid et al., 2025; Yoon and Mallikarjunaiah, 2025).

53 However, the models above assume a single water phase in the reservoir, with the acid dissolved within  
54 it. While single-phase models have been widely used in matrix acidizing studies due to their simplicity  
55 and computational efficiency, they exhibit severe limitations when applied to real reservoir conditions.  
56 A key drawback is the neglect of the oil phase, which is typically present in carbonate and sandstone  
57 formations during acidizing operations. This omission leads to an inability to capture essential two-  
58 phase flow dynamics, including capillary pressure, phase interference, and wettability-driven fluid  
59 redistribution—all of which critically influence acid accessibility and reaction efficiency (Rigi et al.,  
60 2025; Mahdavi Kalatehno et al., 2025). For example, in oil-wet systems, the presence of oil can hinder  
61 acid penetration into the matrix, modify dissolution patterns, and result in an underestimation of the  
62 pore volume required for breakthrough (Elsafih and Fahes, 2021). Additionally, single-phase models  
63 disregard saturation-dependent transport properties and chemical potential gradients, both of which  
64 play a vital role in accurately predicting wormhole development and treatment performance. While  
65 these simplified models are valuable for conceptual studies, their lack of two-phase physics limits their  
66 reliability for field-scale simulations and the optimization of acid stimulation treatments.

67 To address these challenges, researchers have developed two-phase two-scale continuum models by  
68 integrating traditional porous media flow theory with acidizing frameworks (Babaei and Sedighi, 2018;  
69 Wei et al., 2017). Notably, (Sabooniha et al., 2021) proposed a two-dimensional, two-phase model  
70 combining the Cahn–Hilliard phase-field theory with Navier–Stokes equations, solved numerically via  
71 the finite element method. Further advancing the field, (Ma et al., 2022) developed a three-dimensional  
72 two-phase acidizing model for fractured carbonate rocks, utilizing a unified pipe-network method  
73 alongside a sequential implicit time scheme and adaptive time-stepping to enhance simulation accuracy.

74 A critical challenge in carbonate acidizing is the formation of highly permeable flow channels, which  
75 significantly alter flow dynamics due to the combined effects of fluid viscosity and inertia. While most  
76 existing studies model these flows using Darcy's law alone, this approach neglects key factors such as  
77 viscous shear and inertial forces. A more robust alternative is the DBF model, which incorporates  
78 Darcy's law, the Brinkman term, and the Forchheimer correction, making it suitable for high-velocity  
79 flows and heterogeneous porous media. However, despite its advantages, the DBF model has been  
80 applied only to single-phase acidizing simulations (Kou et al., 2016, 2019; Wu and Ye, 2019), leaving  
81 its potential in two-phase systems unexplored. Thus, integrating the two-phase model with the DBF  
82 model is one contribution of this work.

83 The conventional DBF framework accounts only for mass and momentum conservation, neglecting the  
84 energy conservation equation. However, temperature variations—whether due to reservoir conditions  
85 or reaction heat—play a critical role in matrix acidizing. For instance, (Zhou et al., 2022) demonstrated  
86 that elevated temperatures significantly enhance the optimal acid injection rate, while (Jia et al., 2021)  
87 highlighted the pronounced influence of reaction temperature at higher injection rates. Their findings  
88 further indicate that the optimal injection rate decreases with increasing activation energy or decreasing  
89 acid diffusion coefficient, underscoring the necessity of incorporating thermal effects into acidizing  
90 models. To address this gap, (Wu et al., 2021) extended the single-phase DBF model by integrating the  
91 energy conservation equation, forming a thermal DBF framework capable of capturing temperature-  
92 dependent dynamics. However, this model remains limited by its single-phase assumption, restricting  
93 its applicability to real-world reservoir conditions, which typically involve multiphase flow. Therefore,  
94 this work advances the field by developing a novel two-phase thermal DBF model, representing a key  
95 contribution to the understanding of heat-fluid interactions in acidizing processes.

96 The proposed two-phase thermal DBF model addresses the limitations of traditional single-phase and  
97 isothermal frameworks by integrating several key physical mechanisms into a unified formulation. First,  
98 it incorporates multiphase momentum conservation by coupling the DBF equations with relative  
99 permeability functions, allowing for accurate representation of viscous and inertial effects in both water  
100 and oil phases. Second, it introduces energy conservation with interphase mass exchange, capturing  
101 heat transfer processes alongside acid-rock reactions and dissolution-induced phase changes. Third, the  
102 model features temperature-dependent reaction kinetics governed by Arrhenius-type relationships,  
103 enabling spatially resolved predictions of reaction rates under varying thermal conditions. Together,  
104 these components empower the model to simulate complex field phenomena, including thermally  
105 driven wormhole branching, rate optimization guided by thermal feedback, and quantification of  
106 competing effects between reaction enthalpy and viscous dissipation in multiphase systems. This work  
107 thus establishes the first comprehensive two-phase thermal DBF framework, effectively ~~representing a~~  
108 ~~methodological step toward more realistic modeling of multiphase thermal acidizing processes.~~ This  
109 work is organized as following.

110 Introduction: Presents the need for a thermal two-phase acidizing model to address limitations in  
111 existing single-phase or isothermal approaches.

112 Numerical Model: Formulates the coupled mass, momentum, energy, and species transport equations  
113 with temperature-dependent reaction kinetics.

**Deleted:** with high fidelity

**Deleted:** bridging the gap between idealized models and practical field applications where multiphase flow and thermal effects are inherently coupled. represent

118 Solution Procedure: Describes the discretization and solution procedure to implement the model.  
 119 Numerical Experiments: Shows some important conclusions from the numerical experiments.  
 120 Conclusion and Future Work: Summarizes key findings on how thermal and flow conditions govern  
 121 acidizing efficiency. Outlines extensions to heterogeneous media, larger scales, multi-mineral systems,  
 122 and optimization tools.

## 123 2. Numerical Model

124 The two-phase thermal DBF model includes the mass conservation equation for each fluid phase  $\alpha \in$   
 125  $\{w, n\}$ , which is expressed as below.  $w$  represents the wetting phase such as the water phase, and  $n$   
 126 stands for the non-wetting phase such as the oil phase.

$$127 \quad \frac{\partial(\phi S_\alpha)}{\partial t} + \nabla \cdot (\phi S_\alpha \mathbf{u}_\alpha) = 0, \quad (1)$$

128 In the equation,  $\phi$  is the porosity,  $S_\alpha$  is the saturation of phase  $\alpha$ ,  $\mathbf{u}_\alpha$  is the effective velocity of phase  $\alpha$ ,  
 129 and  $t$  is the time. This equation does not consider any source or sink term, and the fluid is  
 130 incompressible. Based on the single-phase DBF equation, the DBF equation for the two-phase  
 131 condition (the momentum conservation equation) is expressed as:

$$132 \quad \rho_\alpha \left( \frac{\partial(\phi S_\alpha \mathbf{u}_\alpha)}{\partial t} + \nabla \cdot (\phi S_\alpha \mathbf{u}_\alpha \otimes \mathbf{u}_\alpha) \right) \\ 133 \quad = -\nabla(p + \mu_\alpha) - \frac{\eta_\alpha \phi S_\alpha}{k_{r\alpha} \mathbf{K}} \mathbf{u}_\alpha + \nabla \cdot \phi S_\alpha \eta_\alpha \nabla \mathbf{u}_\alpha - \phi S_\alpha \rho_\alpha F_\alpha |\mathbf{u}_\alpha| \mathbf{u}_\alpha + \rho_\alpha \mathbf{g}, \quad (2)$$

134 where  $p$  is the fluid pressure,  $\mu_\alpha$  is the capillary pressure potential of phase  $\alpha$ ,  $\eta_\alpha$  is the dynamic  
 135 viscosity,  $\mathbf{K}$  is the absolute permeability,  $k_{r\alpha}$  is the relative permeability,  $\rho_\alpha$  is the mass density of  
 136 phase  $\alpha$ ,  $F_\alpha$  is the Forchheimer drag coefficient, and  $\mathbf{g}$  is the gravity. The fluid is assumed as the  
 137 Newtonian fluids (constant viscosity). The chemical potential  $\mu_\alpha$  due to capillary effects is defined as  
 138 (Kou et al., 2021,2023,2024):

$$139 \quad \mu_w = \gamma_w \ln(S_w) + \gamma_{wn} S_n, \quad (3)$$

$$140 \quad \mu_n = \gamma_n \ln(S_n) + \gamma_{wn} S_w, \quad (4)$$

141 with the saturation constraint

$$142 \quad S_w + S_n = 1, \quad (5)$$

143 where  $\gamma_w$ ,  $\gamma_n$ , and  $\gamma_{wn}$  are phenomenological constants related to fluid-fluid interactions. The transport  
 144 of reactant (acid) concentration  $C_f$  in the wetting phase is governed by:

$$145 \quad \frac{\partial(\phi S_w C_f)}{\partial t} + \nabla \cdot (\phi S_w \mathbf{u}_w C_f) - \nabla \cdot (\phi S_w \mathbf{D}_e \cdot \nabla C_f) = -\frac{S_w a_v k_s k_c C_f}{k_c + k_s}, \quad (6)$$

146 where  $\mathbf{D}_e$  is the effective diffusivity,  $a_v$  is the specific surface area per unit volume,  $k_c$ ,  $k_s$  are reaction  
 147 rate constants for mass transfer and surface reaction, respectively. The porosity-progress equation is  
 148 modeled as:

$$149 \quad \frac{\partial \phi}{\partial t} = \frac{\alpha S_w a_v k_s k_c C_f}{\rho_s (k_c + k_s)}, \quad (7)$$

150 where  $\rho_s$  is the solid matrix density,  $\alpha$  is a stoichiometric coefficient.

151 All the equations above are established with the constant-temperature assumption. However, it is  
 152 known that temperature is an important factor to influence the chemical reaction in reservoirs. Thus, to  
 153 consider the temperature effect, we introduce the energy conservation equation as following.

$$\begin{aligned}
 154 \quad & \sum_{\alpha=w,n} \rho_{\alpha} \theta_{\alpha} \frac{\partial(\phi S_{\alpha} T)}{\partial t} + \rho_s \theta_s \frac{\partial((1-\phi)T)}{\partial t} + \sum_{\alpha=w,n} \rho_{\alpha} \theta_{\alpha} \nabla \cdot (\phi S_{\alpha} \mathbf{v}_{\alpha} T) \\
 155 \quad & - \nabla \cdot (\phi S_w M_w + \phi S_n M_n + (1-\phi) M_s) \nabla T \\
 156 \quad & = -2H_r a_v k_e C_f + \sum_{\alpha=w,n} \left( \frac{\eta_{\alpha} \phi S_{\alpha}}{k_r \alpha K} |\mathbf{v}_{\alpha}|^2 + \eta_{\alpha} \phi S_{\alpha} |\nabla \mathbf{v}_{\alpha}|^2 + \phi S_{\alpha} \rho_{\alpha} F_{\alpha} |\mathbf{v}_{\alpha}|^3 \right), \quad (8)
 \end{aligned}$$

157 where  $T$  stands for the temperature,  $\theta_{\alpha}$  is the specific heat capacity of the phase  $\alpha$ ,  $M_{\alpha}$  is the thermal  
 158 conductivity of the phase  $\alpha$ .  $H_r$  is the reaction heat, which is expressed as

$$159 \quad H_r = -6846 + 8.038T - 0.00322T^2 - 870.3T^{-1}. \quad (9)$$

160 Besides that,  $k_e$  is a coefficient, which is defined as

$$161 \quad k_e = \frac{2k_c k_s}{k_c + 2k_s}. \quad (10)$$

162 The value of the molecular diffusion coefficient  $d_m$  depends on the temperature directly, which is  
 163 called the Arrhenius-type dependencies. It can be expressed as

$$164 \quad d_m = d_{m0} \cdot e^{\frac{E_g}{R_g} \left( \frac{1}{T_0} - \frac{1}{T} \right)}. \quad (11)$$

165 The subscript “0” stands for the initial value.  $E_g$  is the activation energy, and  $R_g$  is the molar gas  
 166 constant. Moreover,  $k_s$  also has the Arrhenius-type dependencies, which is expressed as

$$167 \quad k_s = k_{s0} \cdot e^{\frac{E_g}{R_g} \left( \frac{1}{T_0} - \frac{1}{T} \right)}. \quad (12)$$

168 By the temperature-dependent parameters above, the reaction term in the concentration equation (6)  
 169 and the porosity equation (7) are affected by the temperature.

170 The equations form a fully coupled, nonlinear system that integrates two-phase flow dynamics,  
 171 momentum transport, reactive acid dissolution, porosity evolution, and temperature changes to  
 172 accurately simulate wormhole formation during acidizing operations. Temperature effects are critically  
 173 incorporated through Arrhenius-type dependencies for molecular diffusion ( $d_m$ ) and surface reaction  
 174 rates ( $k_s$ ), which directly influence acid transport (via the acid concentration equation) and porosity  
 175 development (via the porosity-progress equation). The evolving porosity then feeds back into the mass  
 176 and momentum conservation equations by modifying permeability and pore structure parameters, while  
 177 the computed flow velocities and reaction rates determine heat generation in the energy conservation  
 178 equation. This bidirectional coupling creates a continuous feedback loop: updated temperature values  
 179 alter reaction kinetics and transport properties, which in turn affect fluid flow and dissolution patterns.  
 180 The model's ability to capture these complex thermo-hydro-chemical interactions enables precise  
 181 prediction of wormhole propagation under realistic reservoir conditions, providing valuable insights for  
 182 optimizing stimulation treatments through comprehensive parameter sensitivity analysis and  
 183 performance evaluation.

184 In the system,  $S_w$ ,  $\phi$ ,  $p$ ,  $\mathbf{u}_\alpha$ ,  $C_f$  and  $T$  are the main unknowns to be solved by the numerical schemes  
 185 mentioned later. The other variables can be computed by the following equations. The Forchheimer  
 186 drag coefficient is calculated as

$$187 \quad F_\alpha = \frac{1.75}{\sqrt{150(S_\alpha \phi)^3}}. \quad (13)$$

188 The relative permeability is

$$189 \quad k_{r\alpha} = S_\alpha^3. \quad (14)$$

190  $\mathbf{D}_e$  is expressed as

$$191 \quad \mathbf{D}_e = \alpha_{OS} d_m \mathbf{I} + \frac{\|\mathbf{u}_w\|}{\phi S_w} (d_l \mathbf{E} + d_t \mathbf{E}^\perp). \quad (15)$$

192 In 2D condition,

$$193 \quad \mathbf{E} = \frac{1}{\|\mathbf{u}_w\|^2} \begin{pmatrix} u_{wx}^2 & u_{wx}u_{wy} \\ u_{wy}u_{wx} & u_{wy}^2 \end{pmatrix}, \quad (16)$$

$$194 \quad \mathbf{E}^\perp = \mathbf{I} - \mathbf{E}. \quad (17)$$

195  $u_{wx}$ ,  $u_{wy}$  stand for the wetting-phase velocity of the  $x$ - and  $y$ -directions, respectively.  $d_l$  and  $d_t$  stand  
 196 for the longitudinal dispersion coefficient and the transverse dispersion coefficient, respectively.

$$197 \quad d_l = \alpha_{OS} d_m + \frac{2\lambda_x \|\mathbf{u}\| r_p}{\phi}, \quad (18)$$

$$198 \quad d_t = \alpha_{OS} d_m + \frac{2\lambda_T \|\mathbf{u}\| r_p}{\phi}. \quad (19)$$

199  $\alpha_{OS}$  is a constant depending on pore connectivity.  $\lambda_x$  and  $\lambda_T$  are constants depending on the structure  
 200 of the medium. Besides that, there are Kozeny-Carman equations as below

$$201 \quad \frac{K}{K_0} = \frac{\phi}{\phi_0} \left( \frac{\phi(1-\phi_0)}{\phi_0(1-\phi)} \right)^2, \quad (20)$$

$$202 \quad \frac{r_p}{r_0} = \sqrt{\frac{K\phi_0}{K_0\phi}}, \quad (21)$$

$$203 \quad \frac{\alpha_v}{\alpha_0} = \frac{\phi r_0}{\phi_0 r_p}. \quad (22)$$

204 If the matrix is homogeneous, the permeability value  $K$  can be represented as a scalar. Based on Eq.  
 205 (20),  $K$  can be directly calculated once  $\phi$  is known. Furthermore, by combining Eqs. (20) - (22), the  
 206 parameter  $\alpha_v$  can be expressed as a function of  $\phi$ , enabling its determination.  $r_p$  is the pore radius.  $k_c$  is  
 207 calculated from Eq. (23).

$$208 \quad k_c = \frac{d_m}{2r_p} \left( Sh_\infty + 0.7 \left( \frac{2\|\mathbf{u}_w\| r_p \rho_w}{\eta_w} \right)^{\frac{1}{2}} \left( \frac{\eta_w d_m}{\rho_w} \right)^{\frac{1}{3}} \right), \quad (23)$$

209 where  $Sh_\infty$  is the asymptotic Sherwood number.

### 210 3. Solution Procedure

211 The strongly coupled nonlinear equation system presents significant computational challenges due to  
 212 its inherent complexity. To address this, we employ a structured numerical approach using a uniform  
 213 grid with spatial resolutions  $\Delta x$  and  $\Delta y$  in the respective coordinate directions, along with uniform time

214 steps  $\Delta t$  for temporal discretization. The solution adopts a staggered grid arrangement, with primary  
 215 variables (water saturation  $S_w$ , porosity  $\phi$ , pressure  $p$ , acid concentration  $C_f$ , and temperature  $T$ ) stored  
 216 at cell centers while phase velocities  $\mathbf{u}_\alpha$  are defined at cell edges. Spatial approximations are carefully  
 217 implemented: harmonic averaging is applied for edge porosity and permeability using adjacent cell-  
 218 center values, while arithmetic averaging is used for nodal porosity and saturation calculations. The  
 219 scheme employs upwind discretization for both edge saturations and acid concentrations to ensure  
 220 numerical stability. The gradients can be derived with the finite difference method. This conservative  
 221 formulation maintains proper mass balance while effectively handling the complex coupling between  
 222 multiphase flow, reactive transport, evolving porosity-permeability relationships, and temperature  
 223 change that characterize the acidizing process.

224 To solve the coupled system, it is first necessary to define a consistent solution sequence for the  
 225 primary unknowns. The porosity  $\phi^{n+1}$  is updated first, as it is directly governed by the porosity  
 226 evolution equation (Eq. (7)), which is relatively straightforward. A first-order backward Euler scheme  
 227 is used for time discretization throughout the model. Applying this scheme to Eq. (7) allows for the  
 228 explicit computation of the updated porosity at the beginning of each time step, where the superscript  $n$   
 229 denotes the previous time level. Once porosity is updated, the next step is to solve for the wetting-phase  
 230 saturation  $S_w^{n+1}$ . This requires discretizing the wetting-phase mass conservation equation (Eq. (1)),  
 231 which leads to a linear system in which  $S_w^{n+1}$  is the unknown. Solving this system yields the new  
 232 saturation field. Following this, the model proceeds to solve for pressure  $p^{n+1}$  and phase velocities  
 233  $\mathbf{u}_\alpha^{n+1}$  simultaneously, using a coupled formulation of the momentum and mass conservation equations.  
 234 To do so, the mass conservation equations for both wetting and non-wetting phases are summed to  
 235 yield a unified continuity equation:

$$236 \quad \frac{\partial \phi}{\partial t} + \sum_{\alpha=w,n} S_\alpha^{n+1} (\nabla \cdot (\phi S_\alpha \mathbf{u}_\alpha)) = 0. \quad (24)$$

237 This equation, in combination with the momentum equation (Eq. (2)), is discretized to form a linear  
 238 system in which the unknowns are  $p^{n+1}$  and  $\mathbf{u}_\alpha^{n+1}$ . Since the DBF momentum equation is nonlinear in  
 239 velocity, appropriate linearization is performed: the advective term is approximated as  $\nabla \cdot$   
 240  $(\phi S_\alpha \mathbf{u}_\alpha^n \otimes \mathbf{u}_\alpha^{n+1})$ , while the Forchheimer term is linearized as  $\phi S_\alpha \rho_\alpha F_\alpha |\mathbf{u}_\alpha^n| \mathbf{u}_\alpha^{n+1}$ . Once the velocity  
 241 and pressure fields are updated, the acid concentration  $C_f^{n+1}$  is solved by discretizing the reactive  
 242 transport equation (Eq. (6)), again yielding a linear system. The reaction source term is treated  
 243 implicitly using values from the new time step. The final step in the solution sequence is the update of  
 244 temperature  $T^{n+1}$ , governed by the energy conservation equation (Eq. (8)). Here, all temperature-  
 245 dependent terms on the left-hand side are discretized implicitly (using  $T^{n+1}$ ), while the source and  
 246 transport terms on the right-hand side are discretized explicitly (using  $T^n$ ). This approach yields a  
 247 linear system for  $T^{n+1}$ , which can be solved to update the thermal field. This time-stepping procedure  
 248 is repeated iteratively until either the final simulation time is reached or breakthrough occurs.  
 249 Breakthrough is defined as the moment when the pressure drop between the inlet and outlet boundaries  
 250 decreases to within 1% of its initial value, indicating the formation of a high-conductivity channel. It is  
 251 important to ensure that all auxiliary variables are updated prior to their use in the computation of the

primary unknowns. The simulations are advanced using sufficiently small time-steps to ensure stable evolution of the coupled thermo-hydraulic-reactive system. The flowchart of the solution procedure is shown in Figure 1.

High-resolution simulation of matrix acidizing in porous media requires fine computational grids to accurately resolve porosity heterogeneity and capture wormhole dynamics. However, the resulting large-scale systems significantly increase computational demand. To address this, an efficient parallel computing strategy is developed, focusing on domain decomposition, inter-processor communication, and distributed solution of the coupled linear system. More details on the parallelization can be found in (Wu et al., 2015).

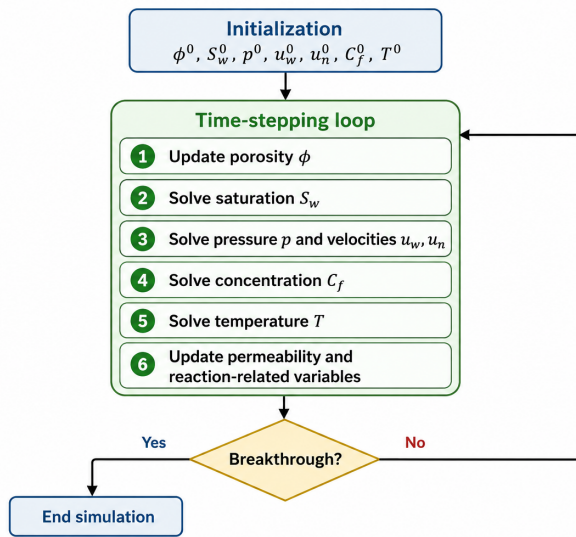

Figure 1 The flowchart of the solution procedure.

## 4. Numerical Experiments

### 4.1 Verification experiments

To verify the numerical implementation, a 2D two-phase nonreactive displacement benchmark is conducted. The computational domain is a rectangle of size 0.1 m × 0.1 m. In this benchmark, clear water rather than reactive acid is injected uniformly from the left boundary and exits through the right boundary, while the top and bottom boundaries are treated as impermeable. Since no chemical reaction is considered, the porosity remains constant at 0.2 throughout the simulation. Thermal effects are also neglected. Initially, the porous medium is partially saturated with water, with an initial water saturation of 0.2. Therefore, the problem reduces to immiscible water–oil displacement in a homogeneous two-dimensional porous medium.

Deleted: To verify the code

274 To further simplify the benchmark, the viscosities of the water and oil phases are both set to 1 Pa·s, and  
 275 the densities of both phases are fixed at 1 kg/m<sup>3</sup>. Capillary pressure effects are neglected by setting  $\gamma_{w_o}$ ,  
 276  $\gamma_{n_o}$  and  $\gamma_{w_n}$  to zero. Gravity is also ignored. The absolute permeability of the domain is prescribed as 1  
 277 m<sup>2</sup>. Water is injected at a constant velocity of  $1.0 \times 10^{-4}$  m/s from the left boundary, while a zero-  
 278 pressure condition is imposed at the right boundary. The remaining parameters are listed in **Table 1**.  
 279 To examine grid convergence, four different uniform meshes consisting of 40×40, 80×80, 120×120,  
 280 and 160×160 cells are used to discretize the computational domain. The time step is fixed at 0.01 s for  
 281 all simulations. The normalized pressure drop obtained from 6000 time-steps using the four different  
 282 computational grids is presented in **Figure 2**. The pressure drop is defined as the absolute difference  
 283 between the average pressures at the inlet and outlet boundaries of the domain. To facilitate  
 284 comparison among different grid resolutions, the pressure drop is normalized by its initial value,  
 285 resulting in the normalized pressure drop reported in the figure.  
 286 The figure demonstrates grid convergence of the numerical code. As the mesh is refined from 40×40 to  
 287 160×160, the normalized pressure-drop curves become progressively closer. The difference between  
 288 the 120×120 and 160×160 results is much smaller than the difference between the coarser-grid results,  
 289 indicating that the solution approaches a grid-independent limit. In particular, all four simulations show  
 290 the same physical trend: the normalized pressure drop decreases monotonically with time as water  
 291 displaces oil and the flow resistance is reduced. The finer-grid solutions preserve this trend while  
 292 producing increasingly similar pressure-drop histories. Therefore, the pressure-drop response is not  
 293 dominated by numerical discretization error, and the results suggest that the implemented two-phase  
 294 flow solver is grid-convergent.

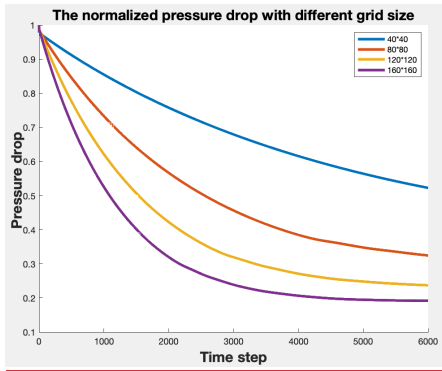

295  
 296 **Figure 2 Normalized pressure drop evolution for the four computational grids.**  
 297 Because the medium is homogeneous and the boundary conditions are uniform in the  $y$ -direction, the  
 298 2D solution should remain essentially one-dimensional:  $S_w(x, y, t) \approx S_w(x, t)$ . Thus, another simple  
 299 numerical verification metric is:

$$E_y(t) = \frac{|S_w(x, y, t) - \overline{S_w}(x, t)|}{S_w(x, t)} \quad (25)$$

301 where

Formatted: Superscript

Formatted: Font: Italic

Formatted: English (US)

Formatted: Els-equation

302 
$$\bar{S}_w(x, t) = \frac{1}{L_y} \int_0^{L_y} S_w(x, y, t) dy. \quad (26)$$

303  $L_y$  stands for the length of the domain in the  $y$ -direction. Three representative points located on the left  
304 boundary of the computational domain are selected for monitoring. These points are positioned at  
305 heights of  $\frac{L_y}{4}$  (down point),  $\frac{L_y}{2}$  (middle point), and  $\frac{3L_y}{4}$  (up point) measured from the bottom boundary.  
306 The temporal evolution of  $E_y(t)$  at these three locations is presented in **Figure 3**.

307 For the coarse mesh of  $40 \times 40$  cells, the relative errors increase continuously during the simulation and  
308 reach values on the order of  $10^{-2}$ . In addition, noticeable differences are observed among the three  
309 monitoring points, indicating that the coarse grid is unable to accurately capture the evolution of the  
310 saturation front and therefore introduces relatively large discretization errors. After refining the mesh to  
311  $80 \times 80$  cells, the relative errors are significantly reduced. Although the errors still vary with time due to  
312 the propagation of the displacement front, the maximum error becomes considerably smaller than that  
313 of the  $40 \times 40$  grid. This demonstrates that mesh refinement improves the numerical accuracy and  
314 enhances the spatial resolution of the two-phase displacement process. For the finest mesh of  $160 \times 160$   
315 cells, the relative errors decrease further and remain on the order of  $10^{-3}$ , which is much smaller than  
316 those observed for the  $40 \times 40$  grid. Furthermore, the error curves corresponding to the three monitoring  
317 points exhibit very similar trends and remain small throughout the entire simulation. This indicates that  
318 the numerical solution becomes increasingly insensitive to additional mesh refinement. Overall, the  
319 results in **Figure 3** clearly show that  $E_y(t)$  is very small and decreases with mesh refinement, which  
320 demonstrates the correctness of the 2D implementation.

Formatted: English (US)

Formatted: Equation

Formatted: Font: Italic

Formatted: Superscript

Formatted: Superscript

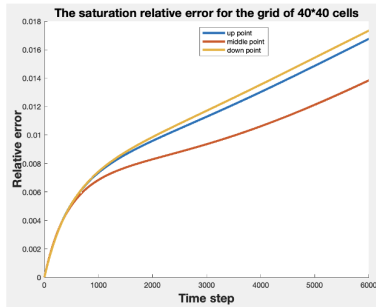

(a) The saturation relative error for the grid of 40\*40 cells.

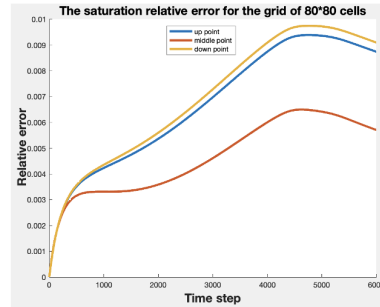

(b) The saturation relative error for the grid of 80\*80 cells.

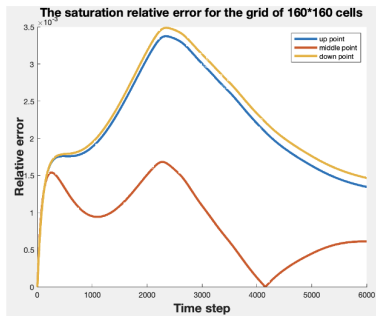

(c) The saturation relative error for the grid of 160\*160 cells.

Deleted:

321

322

**Figure 3 The saturation relative error for different computing grids.**

323

#### 4.2 Experiments with different initial matrix temperatures

324

To investigate the influence of the initial matrix temperature on two-phase acidizing, three numerical experiments on single-reactive-mineral carbonate matrix are conducted, each with a constant acid injection temperature but different initial matrix temperatures. The injection temperature of the acid is maintained at 320 K, while the initial matrix temperatures are set to 320 K, 420 K, and 520 K, respectively. The computational domain is a rectangular matrix measuring 0.1 m × 0.1 m, discretized into a uniform grid of 120 × 120 cells. Initially, the matrix is nearly saturated with oil, with a water saturation of 0.01. Acid is injected from the left boundary at a constant velocity of  $4.17 \times 10^{-5}$  m/s, resulting in a water saturation of 1.0 at that boundary. The injected acid has a concentration of 500 mol/m<sup>3</sup>. The right boundary serves as the outflow, while the top and bottom boundaries are impermeable. To represent natural heterogeneity, the initial porosity is spatially randomized with an average value of 0.18. To that end, the function “random\_number (rand)” in FORTRAN90 is used to generate an array of pseudorandom numbers from the uniform distribution over the range [0, 1]. Then, the numbers in [0, 1] is mapped to another range [0.15, 0.21] by the formulation: new\_rand = 0.06\*rand + 0.15. The average value of new\_rand in [0.15, 0.21] is 0.18. Gravity is applied in the y-direction. The relevant physical and chemical parameters used in the simulations are summarized in [Table 1](#). The simulation is performed with a time step of ten seconds, and the UMFPAK solver is employed for solving the resulting linear systems.

340

Deleted: Table 1

343 Table 1 Physical and chemical parameters of the experiments

| Parameter     | Value                      | Unit            | Physical meaning                          | Source/Note                           |
|---------------|----------------------------|-----------------|-------------------------------------------|---------------------------------------|
| $a_{v0}$      | $5.0 \times 10^{-1}$       | $m^{-1}$        | Initial specific surface area             | Adopted from literature               |
| $C_{f,in}$    | $5.0 \times 10^2$          | $mol/m^3$       | Injected acid concentration               | Simulation core                       |
| $d_{m0}$      | $3.6 \times 10^{-9}$       | $m^2/s$         | Initial molecular diffusion coefficient   | Adopted from studies                  |
| $g_y$         | -9.807                     | $m/s^2$         | Gravitational acceleration in y-direction | Physical constant                     |
| $K_0$         | $9.869233 \times 10^{-16}$ | $m^2$           | Initial permeability                      | Representative carbonate permeability |
| $k_{s0}$      | $2.0 \times 10^{-3}$       | $m/s$           | Initial surface reaction rate constant    | Adopted from literature               |
| $M_n$         | $1.5 \times 10^1$          | $W/(m \cdot K)$ | Thermal conductivity of oil phase         | Assumed thermophysical property       |
| $M_s$         | $5.526 \times 10^2$        | $W/(m \cdot K)$ | Thermal conductivity of solid matrix      | Assumed thermophysical property       |
| $M_w$         | $6.0 \times 10^1$          | $W/(m \cdot K)$ | Thermal conductivity of water phase       | Assumed thermophysical property       |
| $r_0$         | $1.0 \times 10^{-6}$       | $m$             | Initial pore radius                       | Representative scale parameter        |
| $Sh_\infty$   | 3.66                       |                 | Asymptotic Sherwood number                | Classical mass correlation            |
| $\alpha$      | $5.0 \times 10^{-2}$       | $kg/mol$        | Stoichiometric coefficient                | Adopted from model                    |
| $\alpha_{OS}$ | $5.0 \times 10^{-1}$       |                 | Medium structure coefficient              | Assumed porous medium parameter       |
| $\gamma_n$    | 0.0                        | $Pa \cdot s$    | Oil-phase capillary coefficient           | Adopted from studies                  |
| $\gamma_w$    | $5.8 \times 10^2$          | $Pa \cdot s$    | Water-phase capillary coefficient         | Adopted from studies                  |
| $\gamma_{wn}$ | 0.0                        | $Pa \cdot s$    | Interfacial capillary coefficient         | Adopted from studies                  |

|             |                      |                   |                                               |                                 |                             |
|-------------|----------------------|-------------------|-----------------------------------------------|---------------------------------|-----------------------------|
| $\eta_n$    | $1.0 \times 10^{-2}$ | Pa · s            | <u>Dynamic viscosity of oil phase</u>         | Typical reservoir value         | Formatted: Left             |
| $\eta_w$    | $1.0 \times 10^{-3}$ | Pa · s            | <u>Dynamic viscosity of water phase</u>       | Standard fluid                  | Formatted: Left             |
| $\theta_n$  | $2.0 \times 10^2$    | J/(kg · K)        | <u>Specific heat capacity of oil phase</u>    | Assumed thermophysical property | Formatted: Left             |
| $\theta_s$  | $2.0 \times 10^1$    | J/(kg · K)        | <u>Specific heat capacity of solid matrix</u> | Assumed thermophysical property | Formatted: Left             |
| $\theta_w$  | $4.184 \times 10^2$  | J/(kg · K)        | <u>Specific heat capacity of water phase</u>  | Standard thermodynamic value    | Formatted: Left             |
| $\lambda_T$ | $1.0 \times 10^{-1}$ |                   | <u>Transverse dispersivity coefficient</u>    | Typical porous parameter        | Formatted: Left             |
| $\lambda_X$ | $5.0 \times 10^{-1}$ |                   | <u>Longitudinal dispersivity coefficient</u>  | Typical porous parameter        | Formatted: Left             |
| $\rho_n$    | $9.0 \times 10^2$    | kg/m <sup>3</sup> | <u>Density of oil phase</u>                   | Typical reservoir value         | Formatted: Left             |
| $\rho_s$    | $2.71 \times 10^3$   | kg/m <sup>3</sup> | <u>Density of solid matrix</u>                | Typical carbon value            | Formatted: Left             |
| $\rho_w$    | $1.01 \times 10^3$   | kg/m <sup>3</sup> | <u>Density of water phase</u>                 | Standard fluid                  | Formatted: Left             |
| $\phi_0$    | $1.8 \times 10^{-1}$ |                   | <u>Average initial porosity</u>               | Simulation core                 | Formatted: Font: Not Italic |
|             |                      |                   |                                               |                                 | Formatted: Left             |
|             |                      |                   |                                               |                                 | Formatted: Font: Not Italic |

344

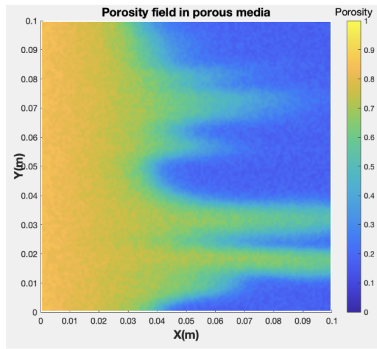

(a) Porosity profile with initial matrix temperature of 320 K.

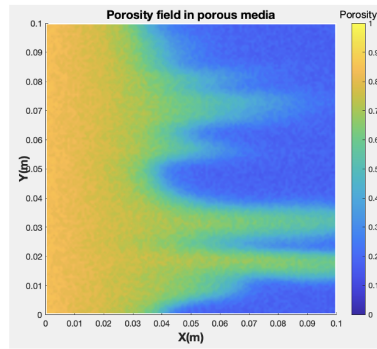

(b) Porosity profile with initial matrix temperature of 420 K.

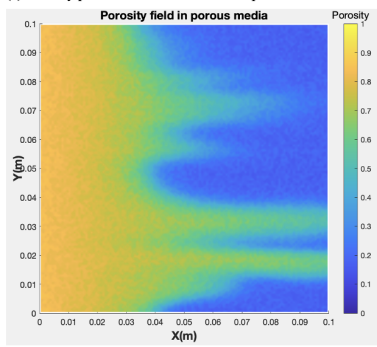

(c) Porosity profile with initial matrix temperature of 520 K.

345

346

347

**Figure 4. Porosity profiles of the two-phase experiments at breakthrough with different initial matrix temperatures.**

Deleted: 1

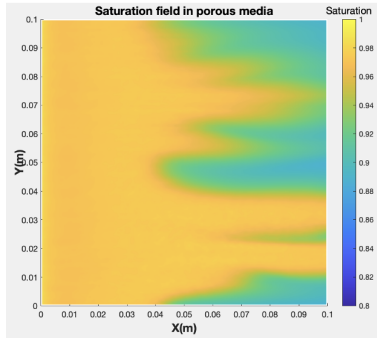

(a) Saturation profile with initial matrix temperature of 320 K.

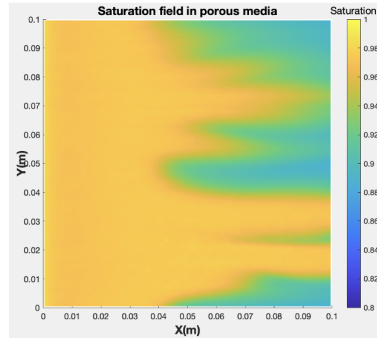

(b) Saturation profile with initial matrix temperature of 420 K.

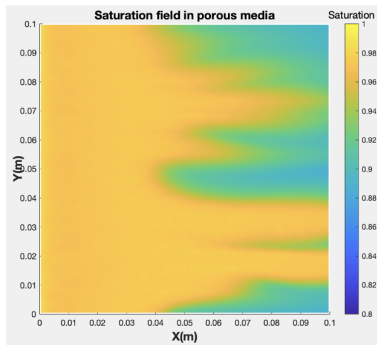

(c) Saturation profile with initial matrix temperature of 520 K.

349

350 **Figure 5. Saturation profiles of the two-phase experiments at breakthrough with different initial**  
 351 **matrix temperatures.**

Deleted: 2

352 The numerical simulations reveal that variations in the initial matrix temperature—set at 320 K, 420 K,  
 353 and 520 K—do not lead to significant differences in the outcome of the two-phase acidizing process.  
 354 Across all three cases, the acid is injected at a constant temperature of 320 K, and the simulation is run  
 355 until breakthrough, which occurs when the pressure differential between inlet and outlet stabilizes  
 356 within 1% of its initial value. The computed pore volume to breakthrough (PVBT) is 6.392 in all  
 357 all scenarios, suggesting that the overall rate of acid propagation and dissolution behavior is largely  
 358 insensitive to the initial thermal state of the matrix.

Formatted: Font color: Red

359 This conclusion can also be drawn from Figure 4 and Figure 5. The two figures show that the porosity  
 360 and saturation profiles at breakthrough are highly similar across the three temperature settings. The  
 361 acid-induced dissolution patterns develop with nearly identical wormhole morphologies, and the acid  
 362 front progresses in a comparable manner through the porous medium. This indicates that, under the  
 363 given conditions, the chemical reaction kinetics and transport processes are predominantly governed by  
 364 the injected acid properties and flow dynamics, rather than the initial temperature of the solid matrix.

Deleted: Figure 1

Deleted: Figure 2

Deleted: figures show t

365 However, the little differences of the simulation results among different initial matrix temperature in  
 366 Figure 4 and Figure 5 cannot be clarified by eyeballs. Thus, the differences in average porosity  
 367 between different initial matrix temperatures during the simulation are given in Figure 6. From the

Deleted: Figure 1

Deleted: Figure 2

Deleted: Figure 3

375 figure, it is clearly seen that the differences between different initial matrix temperatures are in the  
 376 order of  $10^{-7}$  and  $10^{-8}$ , respectively, which demonstrates the negligible influence of initial matrix  
 377 temperatures on acidizing.  
 378

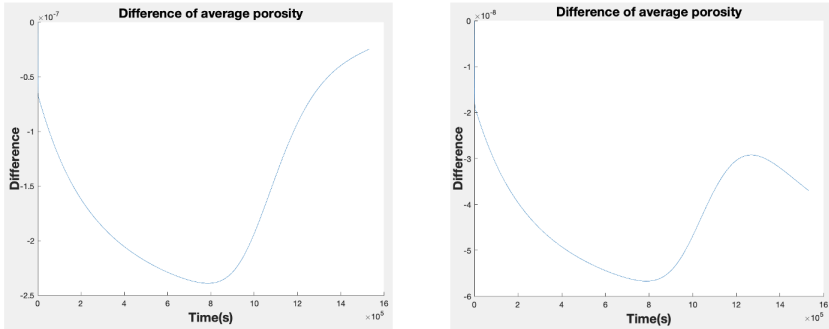

(a) The difference in average porosity between matrices with initial temperatures of 320 K and 420 K. (b) The difference in average porosity between matrices with initial temperatures of 420 K and 520 K.

379  
 380 **Figure 6. Differences in average porosity between different initial matrix temperatures during the**  
 381 **simulation**

Deleted: 3

382 **4.3 Experiments with different acid temperatures**

383 Since the acidizing process shows minimal sensitivity to the initial matrix temperature, this section  
 384 focuses on investigating the influence of the injected acid temperature on the acidizing behavior. The  
 385 initial matrix temperature is fixed at 420 K, while the injection temperatures are varied, set at 290 K  
 386 and 360 K, respectively. It is noted that the range of the acid temperature is generally between 273 K  
 387 and 373 K in real applications, and therefore the acid temperatures outside the range are not  
 388 considered. The simulation is performed with a time step of one second. All other experimental  
 389 conditions remain largely consistent with those described in the previous section.

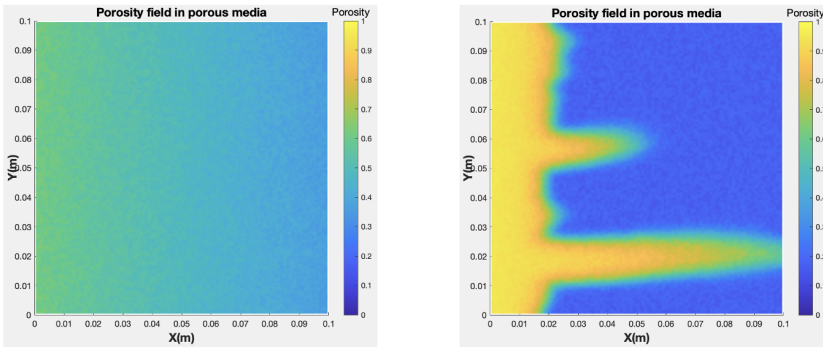

(a) Porosity profile with initial matrix temperature of 290 K. (b) Porosity profile with initial matrix temperature of 360 K.

390  
 391 **Figure 7. Porosity profiles of the two-phase experiments at breakthrough with different acid**  
 392 **temperatures.**

Deleted: 4

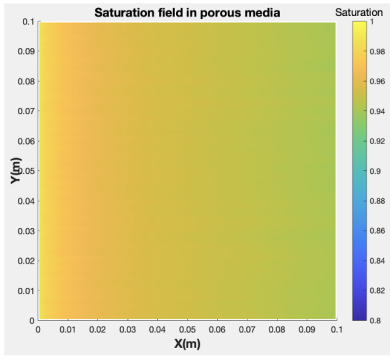

(a) Saturation profile with initial matrix temperature of 290 K.

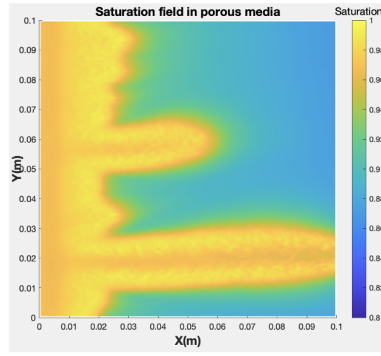

(b) Saturation profile with initial matrix temperature of 360 K.

395

396  
397

**Figure 8. Saturation profiles of the two-phase experiments at breakthrough with different acid temperatures.**

Deleted: 5

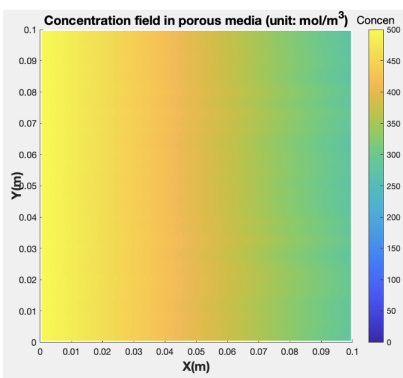

(a) Concentration profile with initial matrix temperature of 290 K.

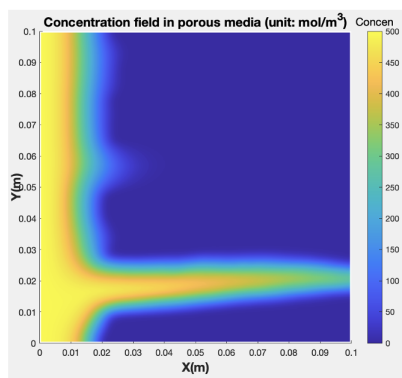

(b) Concentration profile with initial matrix temperature of 360 K.

398

399  
400

**Figure 9. Concentration profiles of the two-phase experiments at breakthrough with different acid temperatures.**

Deleted: 6

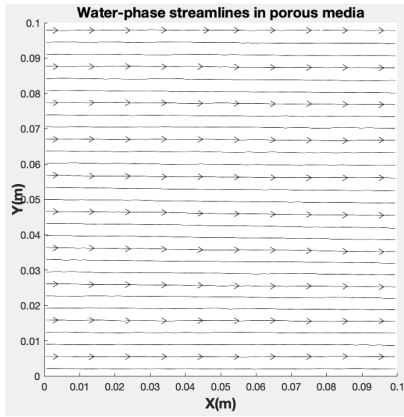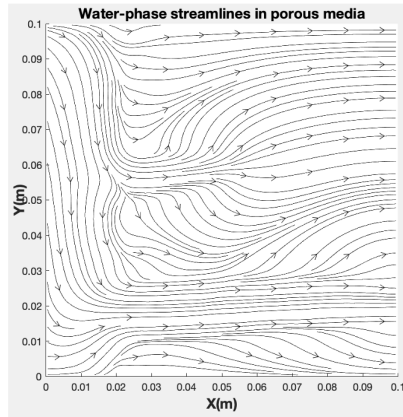

(a) Water-phase streamlines with initial matrix temperature of 290 K.

(b) Water-phase streamlines with initial matrix temperature of 360 K.

403

404 **Figure 10** Water-phase streamlines of the two-phase experiments at breakthrough with different  
405 acid temperatures.

Deleted: 7

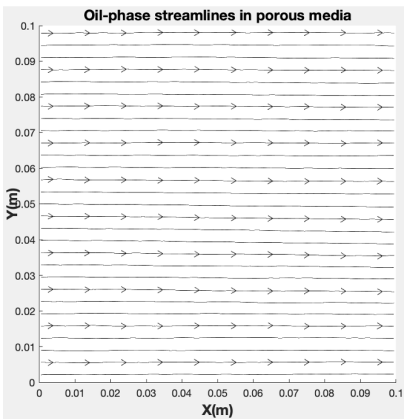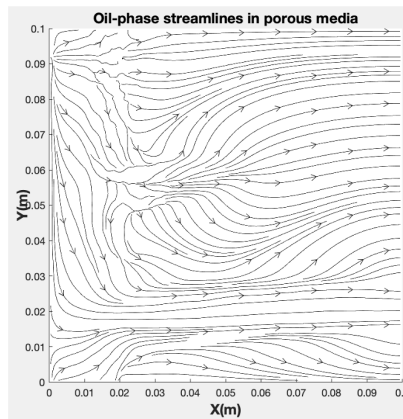

(a) Oil-phase streamlines with initial matrix temperature of 290 K.

(b) Oil-phase streamlines with initial matrix temperature of 360 K.

406

407 **Figure 11** Oil-phase streamlines of the two-phase experiments at breakthrough with different  
408 acid temperatures.

Deleted: 8

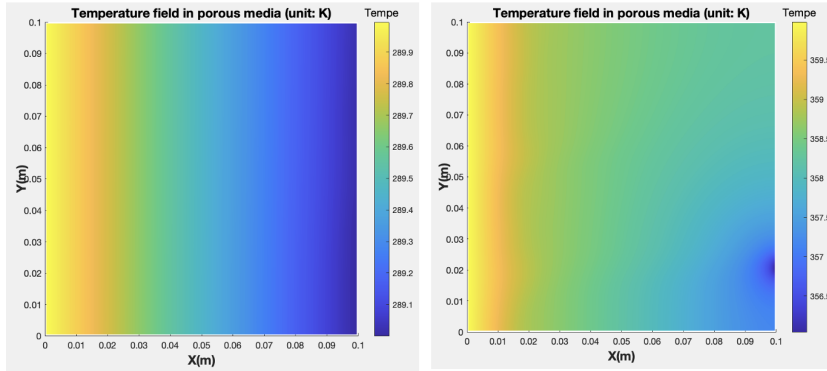

(a) Temperature profile with initial matrix temperature of 290 K. (b) Temperature profile with initial matrix temperature of 360 K.

411  
 412 **Figure 12. Temperature profiles of the two-phase experiments at breakthrough with different**  
 413 **acid temperatures.**

Deleted: 9

414 This section explores the effect of injected acid temperature on the two-phase acidizing process while  
 415 keeping the initial matrix temperature constant at 420 K. Three scenarios are examined: acid injection  
 416 temperatures of 290 K, 320 K (from Section 4.1), and 360 K. **The pore volume to breakthrough**  
 417 **(PVBT) values corresponding to these cases are 10.92, 6.39, and 3.12, respectively.** The results indicate  
 418 a strong dependence of acidizing efficiency on the injected acid temperature. As the injection  
 419 temperature increases, the PVBT significantly decreases, implying faster breakthrough and more  
 420 efficient acid propagation through the matrix. This trend is attributed to the temperature dependence of  
 421 the reaction kinetics—higher injection temperatures accelerate the acid–rock reaction rate, leading to  
 422 faster porosity development, more rapid wormhole formation, and consequently earlier breakthrough.

Formatted: Font color: Red

423 **Figure 7, and Figure 8** present the porosity and saturation profiles at breakthrough for acid injection  
 424 temperatures of 290 K and 360 K. At 360 K, dissolution is highly localized and concentrated, forming  
 425 a well-developed wormhole structure. In contrast, the 290 K case exhibits a more diffuse and  
 426 widespread dissolution front, indicative of slower reaction kinetics and reduced channeling efficiency.  
 427 This behavior corresponds to a uniform dissolution pattern, where acid interacts more evenly with the  
 428 porous matrix rather than focusing along a dominant path. The corresponding saturation profiles further  
 429 support this distinction. At 360 K, water displacement is strongly aligned with the main flow path,  
 430 producing a narrow and well-defined saturation front. Conversely, the 290 K case shows a broader and  
 431 more dispersed water front, reflecting the less focused nature of fluid transport under cooler acid  
 432 injection conditions. For the intermediate case of 320 K (as discussed in Section 4.1), the porosity  
 433 profile lies between the 290 K and 360 K cases. It displays several small branching fingers extending  
 434 from the injection boundary, characteristic of a ramified dissolution pattern. According to (Wu, 2015),  
 435 acidizing can produce five primary dissolution patterns—face, conical, wormhole, ramified, and  
 436 uniform—depending primarily on the increase of the injection velocity, assuming other conditions  
 437 remain constant. Interestingly, the observed trend suggests that increasing the injected acid temperature  
 438 produces similar effects to decreasing the injection velocity, both leading to a transition from uniform  
 439 toward wormhole-type dissolution. This highlights the dual role of thermal and hydrodynamic controls

Deleted: Figure 4

Deleted: Figure 5

443 in shaping the acidizing outcome and suggests that temperature can be used as an alternative lever to  
444 optimize dissolution behavior in two-phase systems.

445 The acid concentration fields (Figure 9) further support these findings. At lower acid temperatures,  
446 acid is consumed more gradually and over a broader region, resulting in a more uniform concentration  
447 distribution. At 360 K, acid is rapidly consumed along the high-permeability wormhole, leading to a  
448 sharp depletion front and improved reactant utilization efficiency. The streamline patterns (Figure 10,  
449 and Figure 11) also reflect the temperature-dependent channelization behavior. For the higher acid  
450 temperature (360 K), streamlines are strongly aligned with the wormhole path, concentrating both  
451 water and oil flow into narrow regions. This results in more focused displacement and enhanced acid  
452 penetration. At 290 K, streamlines are more dispersed, suggesting a less efficient fluid transport and  
453 weaker coupling between dissolution and flow. Finally, temperature profiles (Figure 12) illustrate how  
454 injected acid influences the thermal distribution in the matrix. At 360 K, the elevated injection  
455 temperature maintains a thermal gradient that sustains high reaction rates along the main channel. In  
456 contrast, the 290 K injection case shows a cooler and more diffused thermal field, contributing to lower  
457 reaction intensity. It is noted that the temperature scales are different for the two cases in Figure 12. If  
458 a unified temperature scale is given, the change of the temperature cannot be identified clearly.

459 In summary, the simulation results clearly demonstrate that the injected acid temperature plays a  
460 critical role in the efficiency of the acidizing process. Higher injection temperatures lead to accelerated  
461 reaction rates, more pronounced wormhole formation, and reduced PVBT values, indicating more  
462 efficient usage of the injected fluid. This finding highlights the importance of thermal management in  
463 designing effective acidizing strategies in two-phase flow systems.

#### 464 4.4 Additional parametric study

465 As discussed above, increasing the injected acid temperature appears to have an effect analogous to  
466 decreasing the injection velocity, particularly in terms of dissolution pattern and breakthrough behavior.  
467 To further examine this relationship, two additional simulations are conducted with varying injection  
468 velocities. In all previous experiments, the injection velocity was fixed at  $4.17 \times 10^{-5}$  m/s. In the new  
469 cases, the injection velocity is increased to  $4.17 \times 10^{-4}$  m/s and  $1.0 \times 10^{-3}$  m/s, respectively. The  
470 injected acid temperature is maintained at 360 K, and the initial matrix temperature remains at 420 K  
471 for all scenarios. Thus, under the fixed thermal conditions, three different injection velocities are  
472 considered:  $4.17 \times 10^{-5}$  m/s,  $4.17 \times 10^{-4}$  m/s, and  $1.0 \times 10^{-3}$  m/s. To keep numerical stability, the  
473 simulation time steps are decreased to 0.5 second and 0.1 second for the injection velocities of  $4.17 \times$   
474  $10^{-4}$  m/s and  $1.0 \times 10^{-3}$  m/s, respectively. The simulation results corresponding to the lowest velocity  
475 have already been presented in Section 4.2. The results for the two higher-velocity cases are provided  
476 and discussed in the following section.

Deleted: Figure 6

Deleted: Figure 7

Deleted: Figure 8

Deleted: Figure 9

Deleted: Figure 9

Deleted: Verification experiments

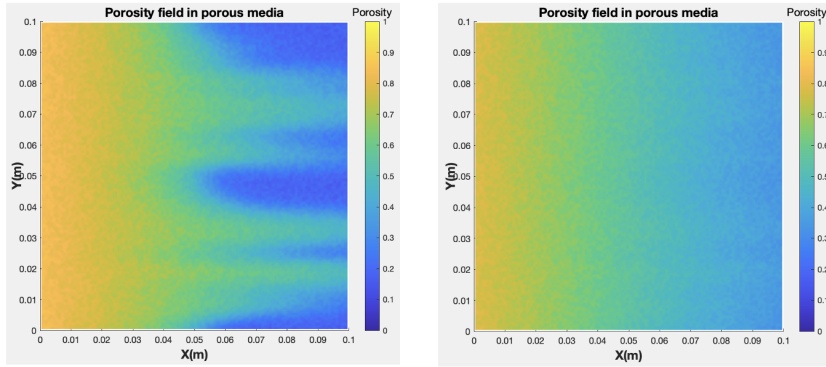

(a) Porosity profile with injection velocity of  $4.17 \times 10^{-4}$  m/s. (b) Porosity profile with injection velocity of  $1.0 \times 10^{-3}$  m/s.

**Figure 13** Porosity profiles of the two-phase experiments at breakthrough with different injection velocity.

Deleted: 10

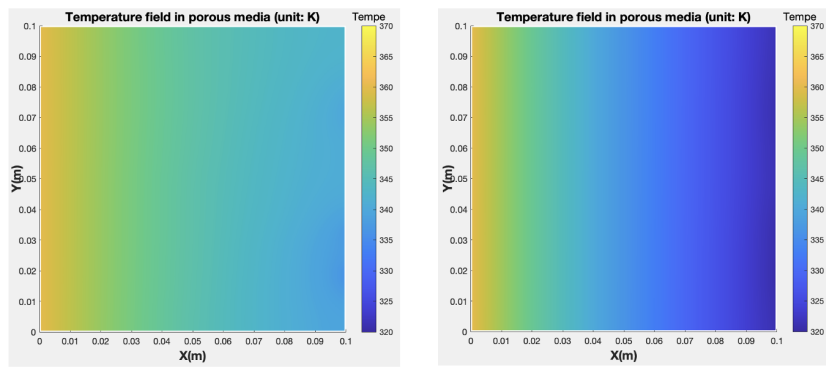

(a) Temperature profile with injection velocity of  $4.17 \times 10^{-4}$  m/s. (b) Temperature profile with injection velocity of  $1.0 \times 10^{-3}$  m/s.

**Figure 14** Temperature profiles of the two-phase experiments at breakthrough with different injection velocity.

Deleted: 11

The porosity fields at breakthrough (**Figure 13**) reveal a distinct shift in the dissolution pattern as the injection velocity increases. At an injection velocity of  $4.17 \times 10^{-4}$  m/s, the dissolution exhibits a ramified pattern, characterized by multiple branching wormholes extending from the injection boundary. This morphology reflects a moderately efficient reaction front where several channels compete and develop simultaneously. In contrast, at the higher injection velocity of  $1.0 \times 10^{-3}$  m/s, the dissolution becomes more uniform, with acid spreading broadly across the domain and minimal evidence of localized channeling. This suggests that the elevated flow rate dilutes the acid-rock interaction front, preventing the formation of focused wormholes and instead promoting a diffuse dissolution regime. These observed transitions align well with the established classification of dissolution patterns (face  $\rightarrow$  conical  $\rightarrow$  wormhole  $\rightarrow$  ramified  $\rightarrow$  uniform) as a function of increasing injection velocity (Wu, 2015). Specifically, the simulation with  $4.17 \times 10^{-4}$  m/s corresponds to the ramified regime, while the simulation with  $1.0 \times 10^{-3}$  m/s corresponds to the uniform regime. These

Deleted: Figure 10

504 findings reinforce the earlier conclusion that increasing the injected acid temperature has an effect  
 505 analogous to decreasing the injection velocity, as both strategies favor more localized dissolution and  
 506 efficient wormhole formation. The observations are summarized in **Table 2**,  
 507 The temperature fields (**Figure 14**) show that in both cases, the matrix is thermally dominated by the  
 508 injected acid at 360 K, which progressively displaces the initially hotter matrix temperature of 420 K.  
 509 The primary distinction lies in the temperature gradient: the simulation with  $1.0 \times 10^{-3}$  m/s exhibits a  
 510 wider range between the maximum and minimum temperatures, indicating a more pronounced  
 511 temperature gradient. This suggests that higher injection velocities enhance advective heat transport,  
 512 leading to sharper thermal fronts across the domain.

Deleted: Table 2

Deleted: Figure 11

513 **Table 2 Dissolution patterns in different thermal and hydrodynamic conditions**

| Dissolution pattern | $T_{\text{injection acid}} = 360 \text{ K}$                   | $v_{\text{injection acid}} = 4.17 \times 10^{-5} \text{ m/s}$ |
|---------------------|---------------------------------------------------------------|---------------------------------------------------------------|
|                     | $T_{\text{initial matrix}} = 420 \text{ K}$                   | $T_{\text{initial matrix}} = 420 \text{ K}$                   |
| <b>Uniform</b>      | $v_{\text{injection acid}} = 1.0 \times 10^{-3} \text{ m/s}$  | $T_{\text{injection acid}} = 290 \text{ K}$                   |
| <b>Ramified</b>     | $v_{\text{injection acid}} = 4.17 \times 10^{-4} \text{ m/s}$ | $T_{\text{injection acid}} = 320 \text{ K}$                   |
| <b>Wormhole</b>     | $v_{\text{injection acid}} = 4.17 \times 10^{-5} \text{ m/s}$ | $T_{\text{injection acid}} = 360 \text{ K}$                   |

514  
 515 Overall, the results demonstrate that increasing the injection velocity leads to a transition from  
 516 wormhole-like to ramified and eventually uniform dissolution patterns. This behavior confirms the  
 517 earlier observation that raising acid temperature produces similar physical effects to lowering injection  
 518 velocity, as both alter the balance between reaction and transport processes. These insights are critical  
 519 for optimizing acidizing strategies, highlighting the importance of simultaneously managing  
 520 temperature and flow rate to achieve the desired dissolution morphology and stimulation efficiency.

521 **5. Conclusion and Future Work**

522 In this work, we developed a novel two-phase thermal Darcy–Brinkman–Forchheimer (DBF) model to  
 523 simulate matrix acidization processes in porous media under realistic reservoir conditions. The model  
 524 integrates multiphase flow, reactive transport, heat transfer, and dynamic porosity evolution into a  
 525 unified framework. Key contributions include the incorporation of temperature-dependent reaction  
 526 kinetics via Arrhenius-type relationships, as well as a fully coupled numerical solution strategy that  
 527 accounts for viscous, inertial, and thermal effects.

528 Numerical experiments were conducted to investigate the influence of initial matrix temperature,  
 529 injected acid temperature, and injection velocity on the acidizing process. Results showed that the  
 530 initial matrix temperature has minimal impact on wormhole formation and breakthrough behavior due  
 531 to rapid thermal equilibration driven by acid injection. In contrast, the injected acid temperature  
 532 significantly affects the dissolution pattern, reaction rate, and acid utilization efficiency. Higher  
 533 injection temperatures enhance reaction rates and promote localized wormhole formation, resulting in  
 534 earlier breakthrough and reduced pore volume to breakthrough (PVBT).

537 Furthermore, ~~the simulations from additional parametric study~~ demonstrated that increasing acid  
538 temperature has a similar effect to decreasing injection velocity. Both approaches shift the dissolution  
539 regime from uniform to wormhole-dominated patterns, highlighting a fundamental coupling between  
540 thermal and hydrodynamic controls. These insights offer practical guidance for optimizing acidizing  
541 strategies by balancing thermal input and flow rate to improve treatment efficiency and control  
542 wormhole geometry.

543 ~~The present work primarily serves as a methodological study for investigating coupled thermo-~~  
544 ~~hydraulic-reactive processes in two-phase thermal acidizing systems. Although the proposed~~  
545 ~~framework demonstrates the capability to capture the influence of thermal and hydrodynamic~~  
546 ~~conditions on dissolution behavior and wormhole formation in laboratory-scale simulations, several~~  
547 ~~aspects require further investigation before broader practical applications can be considered.~~

548 ~~Future work will focus on extending the current framework to more complex porous media~~  
549 ~~configurations, including heterogeneous permeability and porosity distributions, natural fractures, and~~  
550 ~~vuggy carbonate structures. In addition, incorporating multi-mineral reaction mechanisms and~~  
551 ~~competing acid-rock interactions may improve the representation of chemically complex reservoir~~  
552 ~~conditions. Since the present study is limited to two-dimensional laboratory-scale numerical~~  
553 ~~experiments, additional work is also required to investigate larger-scale simulations and improve~~  
554 ~~computational efficiency through techniques such as parallel computing optimization and adaptive~~  
555 ~~mesh refinement.~~

556 ~~Furthermore, validation against experimental observations and established benchmark studies will be~~  
557 ~~an important direction for future research in order to further assess the predictive capability and~~  
558 ~~robustness of the proposed model. Possible future extensions may also include coupling with wellbore~~  
559 ~~and reservoir-scale models, as well as the development of reduced-order or surrogate models for~~  
560 ~~efficient parameter studies and optimization tasks.~~

#### 561 **Code availability**

562 Name of the code: Two-phase thermal DBF matrix acidizing simulator  
563 Contact: wuyuanq@gmail.com, +86-13928772190  
564 Hardware requirements: CPU: 2.2 GHz 6-Core Intel Core i7, Memory: 16 GB 2400 MHz DDR4  
565 Program language: FORTRAN90, MATLAB, TECPLOT  
566 Software required: LAPACK, UMFPACK, MUMPS, HYPRE, MPI  
567 Program size: more than 10000 lines  
568 The source codes are available for downloading at the link: <https://doi.org/10.5281/zenodo.17272888>  
569 (Wu, 2025)

#### 570 **Author contribution**

571 Wu: programming, the design and realization of the numerical experiments, the writing of the work.  
572 Kou: concepts of the work, the development of the numerical models, the algorithm design of the  
573 numerical scheme, the writing of the work.

Deleted: verification

Deleted: ¶

Deleted: While the current model provides a robust platform for simulating two-phase thermal acidizing, several directions remain for further enhancement. Future extensions will incorporate complex geological features such as natural fractures, vugs, and spatial heterogeneity in porosity and permeability. These additions will enable more realistic simulation of carbonate formations and fractured reservoirs. Moreover, the current study focuses on lab-scale domains. Scaling up the framework to field-scale models will require further optimization of the numerical solver, including parallel performance tuning and adaptive mesh refinement techniques. Besides that, incorporating multi-mineral reaction kinetics and competing acid-rock interactions (e.g., dolomite and calcite dissolution) will enhance the chemical fidelity of the model and broaden its applicability to various rock types. To better evaluate stimulation effectiveness, coupling the matrix acidizing model with wellbore dynamics and reservoir-scale production forecasting will be explored. Furthermore, data from high-fidelity simulations can be used to train surrogate models or integrate with machine learning algorithms for real-time optimization of injection schedules, temperature control, and acid composition.¶ These directions will further strengthen the capability of the proposed framework for practical reservoir engineering applications and enable more accurate design and evaluation of acidizing treatments in complex subsurface environments.¶

602 **Competing interests**

603 The authors declare that they have no conflict of interest.

604 **Acknowledgements**

605 This manuscript was prepared with the assistance of ChatGPT, a language model developed by  
606 OpenAI, which was used for refining language. The authors have reviewed, revised and approved the  
607 final content.

608 **References**

- 609 Alokaily, S. A.: Numerical Simulations of Fluid Transport in Heterogeneous Darcy–Forchheimer–  
610 Brinkman Layers, *Journal of Fluids Engineering*, 144(12), 121404,  
611 <https://doi.org/10.1115/1.4055072>, 2022.
- 612 Araújo, E. D. A., Schwalbert, M. P., Leitão, R. J., & Aum, P. T. P.: Influence of Matrix-Acidizing  
613 Design on Oil Recovery and Economics in Carbonate Reservoirs Undergoing Waterflooding  
614 Offshore in Brazil, *Energies*, 17(4), 883, <https://doi.org/10.3390/en17040883>, 2024.
- 615 Babaei, M., & Sedighi, M.: Impact of phase saturation on wormhole formation in rock matrix acidizing,  
616 *Chemical Engineering Science*, 177, 39-52, <https://doi.org/10.1016/j.ces.2017.10.046>, 2018.
- 617 Daccord, G., Lenormand, R., & Lietard, O.: Chemical dissolution of a porous medium by a reactive  
618 fluid—I. Model for the “wormholing” phenomenon, *Chemical Engineering Science*, 48(1), 169-  
619 178, [https://doi.org/10.1016/0009-2509\(93\)80293-Y](https://doi.org/10.1016/0009-2509(93)80293-Y), 1993. a
- 620 Daccord, G., Lietard, O., & Lenormand, R.: Chemical dissolution of a porous medium by a reactive  
621 fluid—II. Convection vs reaction, behavior diagram, *Chemical engineering science*, 48(1), 179-  
622 186, [https://doi.org/10.1016/0009-2509\(93\)80294-Z](https://doi.org/10.1016/0009-2509(93)80294-Z), 1993. b
- 623 Deb, N., Farshi, M. S., Das, P. K., & Saha, S.: Convective flow optimization inside a lid-driven  
624 chamber with a rotating porous cylinder using Darcy–Brinkman–Forchheimer model, *Journal of*  
625 *Thermal Analysis and Calorimetry*, 149(12), 6125-6146, [https://doi.org/10.1007/s10973-024-](https://doi.org/10.1007/s10973-024-13228-y)  
626 13228-y, 2024.
- 627 Elsafih, M., & Fahes, M.: Quantifying the effect of multiphase flow on matrix acidizing in oil-bearing  
628 carbonate formations, *SPE Production & Operations*, 36(04), 795-806,  
629 <https://doi.org/10.2118/205397-PA>, 2021.
- 630 Fredd, C. N., & Fogler, H. S.: Influence of transport and reaction on wormhole formation in porous  
631 media, *AIChE journal*, 44(9), 1933-1949, <https://doi.org/10.1002/aic.690440902>, 1998.
- 632 Golfier, F., Zarcone, C., Bazin, B., Lenormand, R., Lasseux, D., & Quintard, M.: On the ability of a  
633 Darcy-scale model to capture wormhole formation during the dissolution of a porous medium,  
634 *Journal of fluid Mechanics*, 457, 213-254, <https://doi.org/10.1017/S0022112002007735>, 2002.
- 635 Jia, C., Sepehrmoori, K., & Yao, J.: Numerical studies and analysis on reactive flow in matrix acidizing  
636 coupled thermal-hydrological-mechanical-chemical processes, In *ARMA US Rock*  
637 *Mechanics/Geomechanics Symposium* (pp. ARMA-2021). ARMA, 2021 June.
- 638 Kou, J., Sun, S., & Wu, Y.: Mixed finite element-based fully conservative methods for simulating  
639 wormhole propagation, *Computer Methods in Applied Mechanics and Engineering*, 298, 279-302,  
640 <https://doi.org/10.1016/j.cma.2015.09.015>, 2016.

641 Kou, J., Sun, S., & Wu, Y.: A semi-analytic porosity evolution scheme for simulating wormhole  
642 propagation with the Darcy–Brinkman–Forchheimer model, *Journal of Computational and*  
643 *Applied Mathematics*, 348, 401-420, <https://doi.org/10.1016/j.cam.2018.08.055>, 2019.

644 Kou, J., Du, S., & Zhong, Z.: Energy stable modeling of two-phase flow in porous media with fluid–  
645 fluid friction force using a Maxwell-Stefan-Darcy approach, *Physics of Fluids*, 33, 073312,  
646 <https://doi.org/10.1063/5.0053373>, 2021.

647 Kou, J., Chen, H., Du, S., & Sun, S.: An efficient and physically consistent numerical method for the  
648 Maxwell-Stefan-Darcy model of two-phase flow in porous media, *International Journal for*  
649 *Numerical Methods in Engineering*, 124(3), 546-569, <https://doi.org/10.1002/nme.7131>, 2023.

650 Kou, J., Wang, X.: Numerical modeling of unsaturated flow in porous media using a thermodynamical  
651 approach, *Capillarity*, 11, 63-69, <https://doi.org/10.46690/capi.2024.06.01>, 2024.

652 Ma, G., Chen, Y., Wang, H., Li, T., & Nie, W.: Numerical analysis of two-phase acidizing in fractured  
653 carbonate rocks, *Journal of Natural Gas Science and Engineering*, 103, 104616,  
654 <https://doi.org/10.1016/j.jngse.2022.104616>, 2022.

655 Mahdavi Kalatehno, J., Khamehchi, E., Keihanikamal, M., Yousefmarzi, F., Dargi, M., & Daneshfar,  
656 P.: A successful case study of using HCl and viscoelastic diverting acid systems for carbonate  
657 matrix acidizing in an oil well with optimized predictive model, *Journal of Petroleum Exploration*  
658 *and Production Technology*, 15(1), 1, <https://doi.org/10.1007/s13202-024-01896-3>, 2025.

659 Panga, M. K., Ziauddin, M., & Balakotaiah, V.: Two - scale continuum model for simulation of  
660 wormholes in carbonate acidization, *AIChE journal*, 51(12), 3231-3248,  
661 <https://doi.org/10.1002/aic.10574>, 2005.

662 Qureshi, U., Qureshi, H. A., Bhatti, A. A., Saeed, M. S., & Khalid, M. S.: Investigating the effects of  
663 matrix acidizing and acid fracturing on the production optimization of a carbonate reservoir: a  
664 case study, *Arabian Journal of Geosciences*, 16(11), 620, [https://doi.org/10.1007/s12517-023-](https://doi.org/10.1007/s12517-023-11734-1)  
665 [11734-1](https://doi.org/10.1007/s12517-023-11734-1), 2023.

666 Sabooniha, E., Rokhforouz, M. R., Kazemi, A., & Ayatollahi, S.: Numerical analysis of two-phase  
667 flow in heterogeneous porous media during pre-flush stage of matrix acidizing: Optimization by  
668 response surface methodology, *Physics of Fluids*, 33(5), <https://doi.org/10.1063/5.0046106>, 2021.

669 Shahid, A., Wei, W., Abbas, T., & Bhatti, M. M.: A computational investigation of diffusivities and  
670 heat transfer in the flow of viscoelastic fluid through Darcy–Brinkman–Forchheimer medium,  
671 *Numerical Heat Transfer, Part B: Fundamentals*, 86(3), 762-779,  
672 <https://doi.org/10.1080/10407790.2023.2296076>, 2025.

673 Wei, W., Varavei, A., & Sepehrmoori, K.: Modeling and analysis on the effect of two-phase flow on  
674 wormhole propagation in carbonate acidizing, *SPE Journal*, 22(06), 2067-2083,  
675 <https://doi.org/10.2118/186111-pa>, 2017.

676 Wu, Y.: Parallel reservoir simulations with sparse grid techniques and applications to wormhole  
677 propagation, 2015.

678 Wu, Y. (2025). Two-phase thermal DBF matrix acidizing simulator. Zenodo.  
679 <https://doi.org/10.5281/zenodo.17272888>

680 Wu, Y., Kou, J., & Sun, S.: Matrix acidization in fractured porous media with the continuum fracture  
681 model and thermal Darcy-Brinkman-Forchheimer framework, *Journal of Petroleum Science and*  
682 *Engineering*, 211, 110210, <https://doi.org/10.1016/j.petrol.2022.110210>, 2022.

683 Wu, Y., Kou, J., Sun, S., & Wu, Y. S.: Thermodynamically consistent Darcy–Brinkman–Forchheimer  
684 framework in matrix acidization, *Oil & Gas Science and Technology–Revue d’IFP Energies*  
685 *nouvelles*, 76, 8, <https://doi.org/10.2516/ogst/2020091>, 2021.

- 686 Wu, Y., Salama, A., & Sun, S.: Parallel simulation of wormhole propagation with the Darcy–  
687 Brinkman–Forchheimer framework, *Computers and Geotechnics*, 69, 564-577,  
688 <https://doi.org/10.1016/j.compgeo.2015.06.021>, 2015.
- 689 Wu, Y., & Ye, M.: A Newton’s second law abided Darcy-Brinkman-Forchheimer framework in matrix  
690 acidization simulation, In *International Conference on Computational & Experimental*  
691 *Engineering and Sciences* (pp. 861-866), Cham: Springer International Publishing,  
692 [https://doi.org/10.1007/978-3-030-27053-7\\_73](https://doi.org/10.1007/978-3-030-27053-7_73), 2019 March.
- 693 Yoon, H. C., & Mallikarjunaiah, S. M.: A stabilized finite element method for steady Darcy-Brinkman-  
694 Forchheimer flow model with different viscous and inertial resistances in porous media, *arXiv*  
695 preprint [arXiv:2501.04041](https://arxiv.org/abs/2501.04041), 2025.
- 696 Zhou, L., Guo, A., Wang, X., Qiao, J., & Tang, X.: The effect of temperature, natural fractures and  
697 vugs on the acidizing process in fractured-vuggy reservoirs with hydro-thermal-chemical coupled  
698 modeling, *Journal of Petroleum Science and Engineering*, 213, 110416,  
699 <https://doi.org/10.1016/j.petrol.2022.110416>, 2022.
